# Supplementary material for: A Large-Scale Functional Analysis of Putative Target Genes of Mating-Type Loci Provides Insight into the Regulation of Sexual Development of the Cereal Pathogen Fusarium graminearum
Source: PubMed Central journal article supplement (PMC4559316; doi:10.1371/journal.pgen.1005486), 2015-09-03
Supplement: pgen.1005486.s013.pdf [file pgen.1005486.s013.pdf]

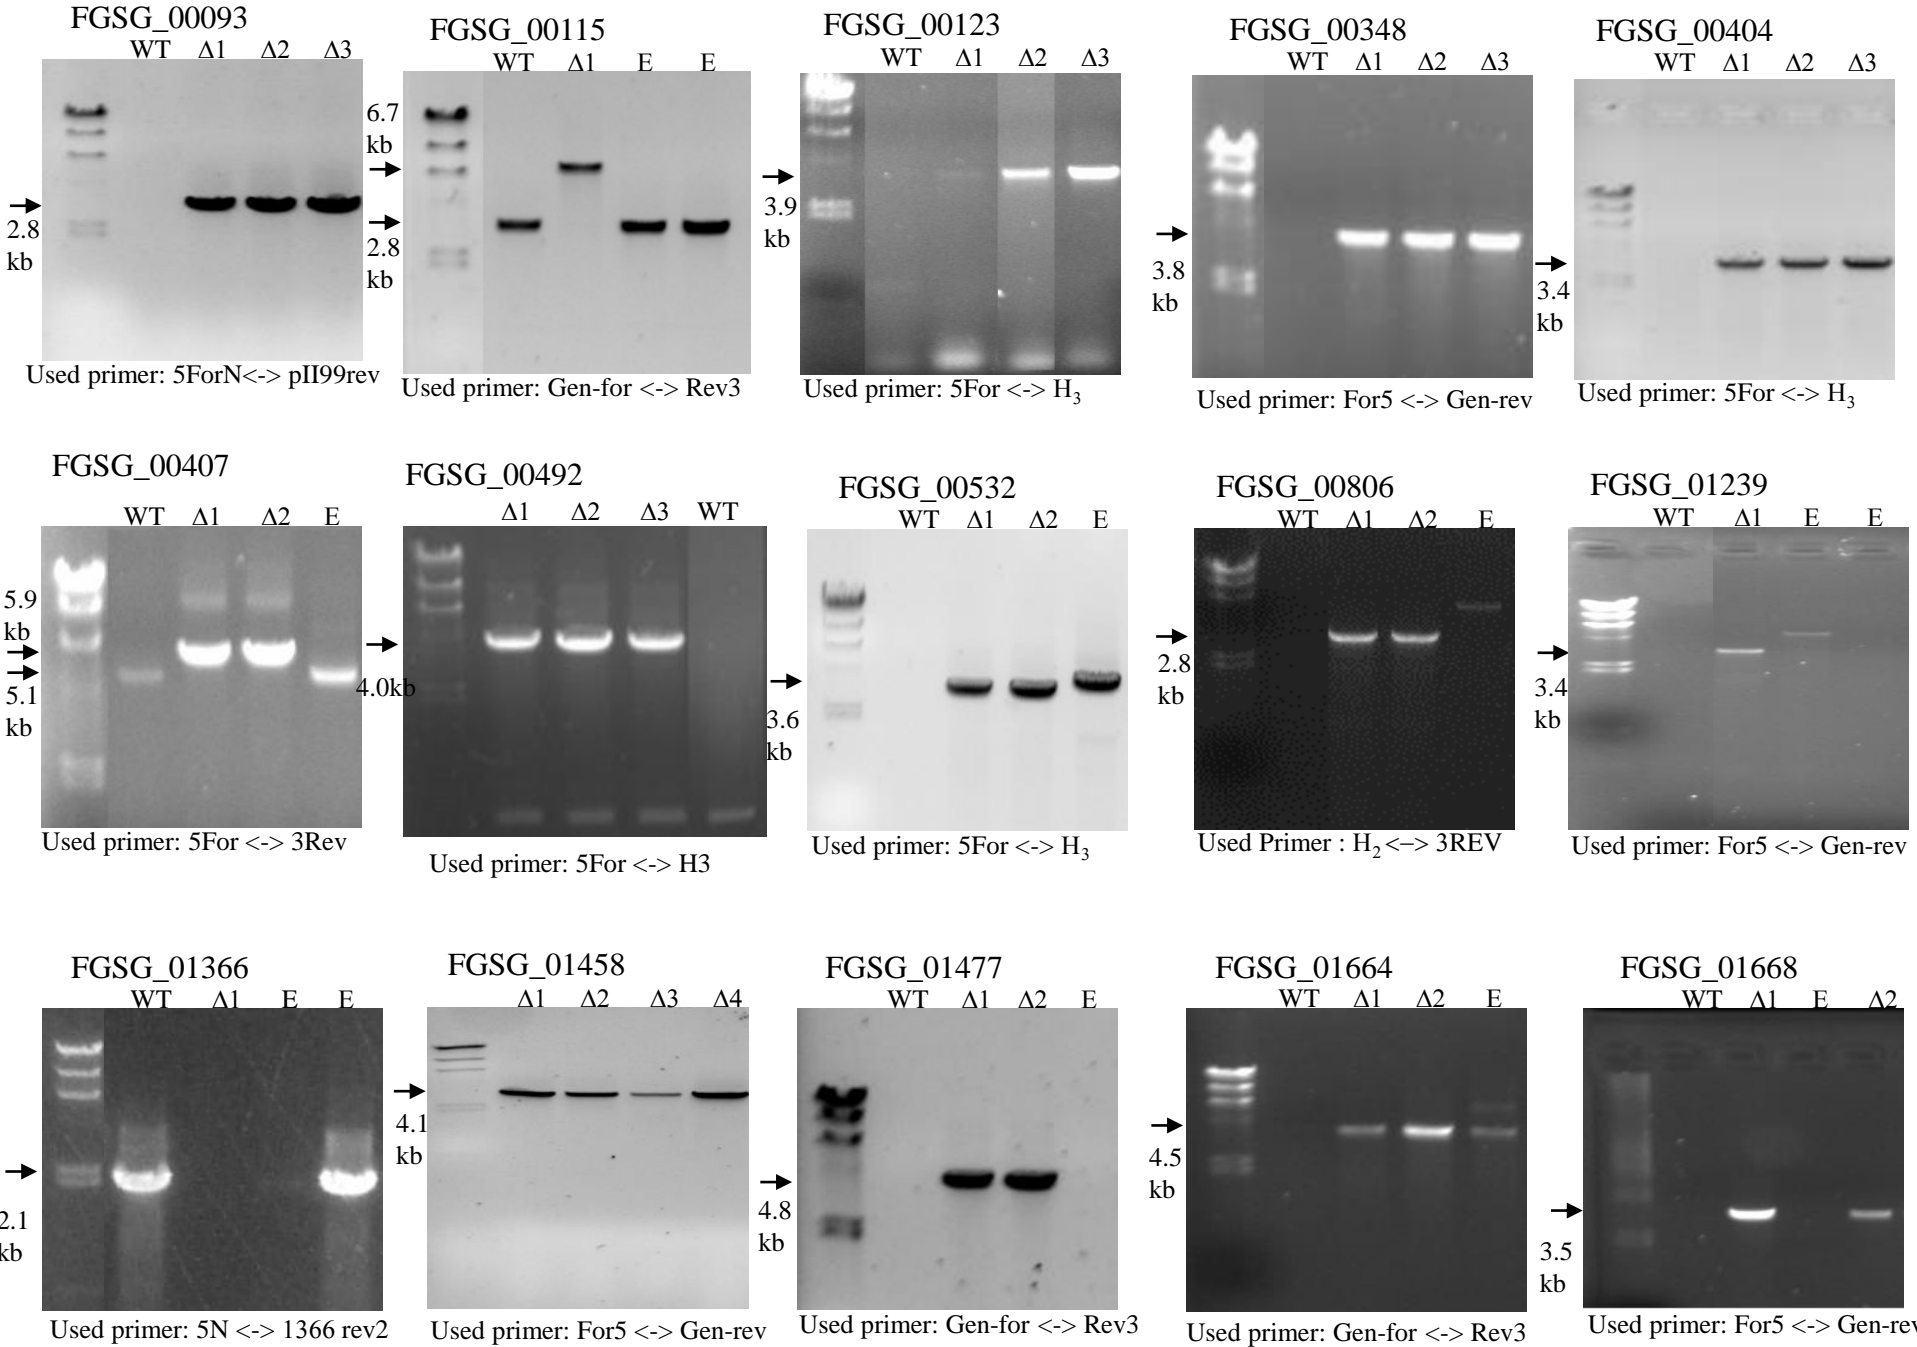

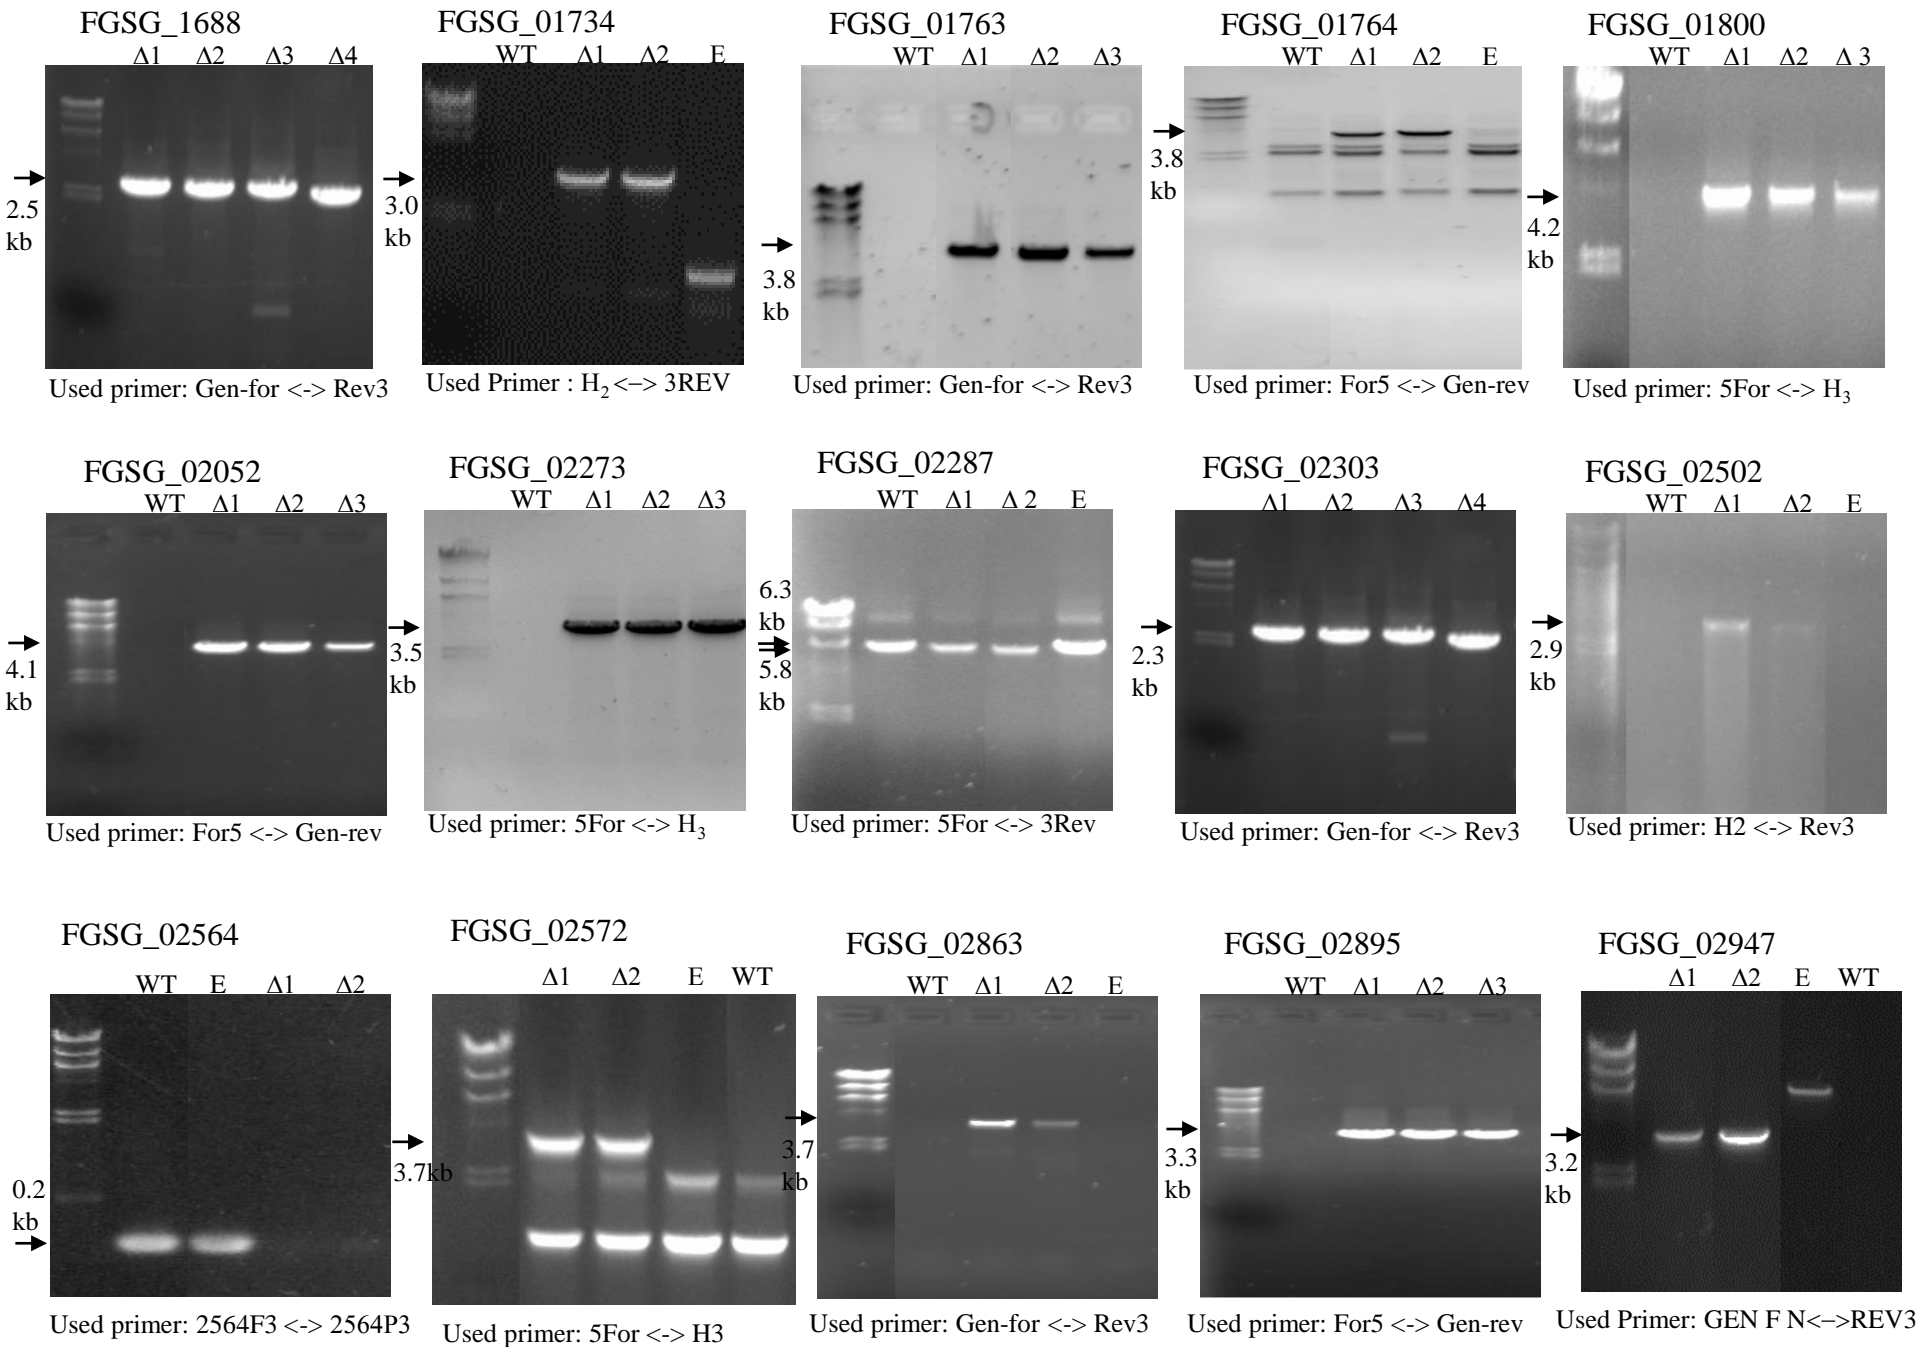

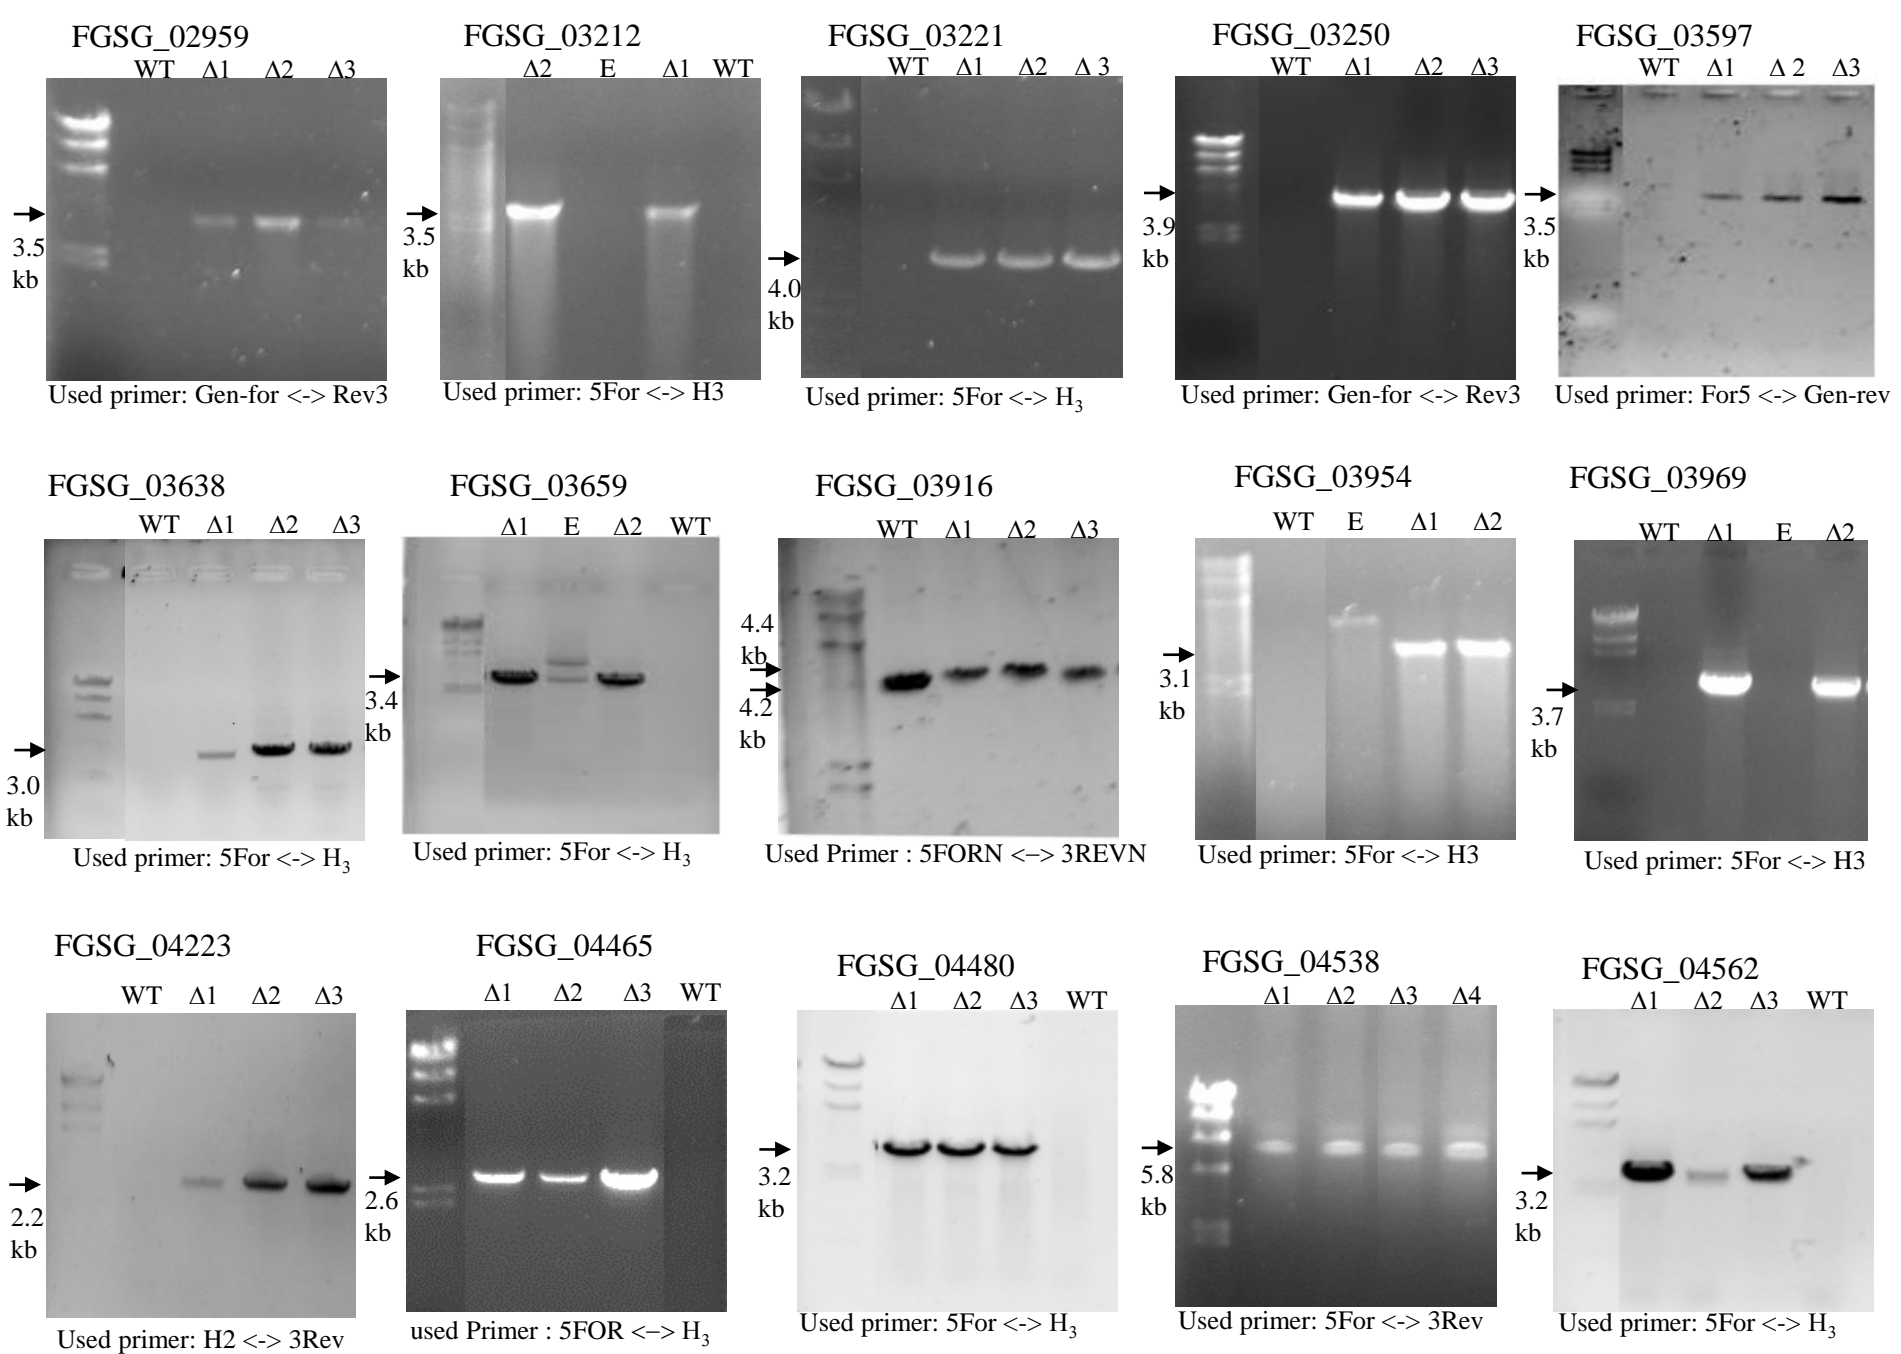

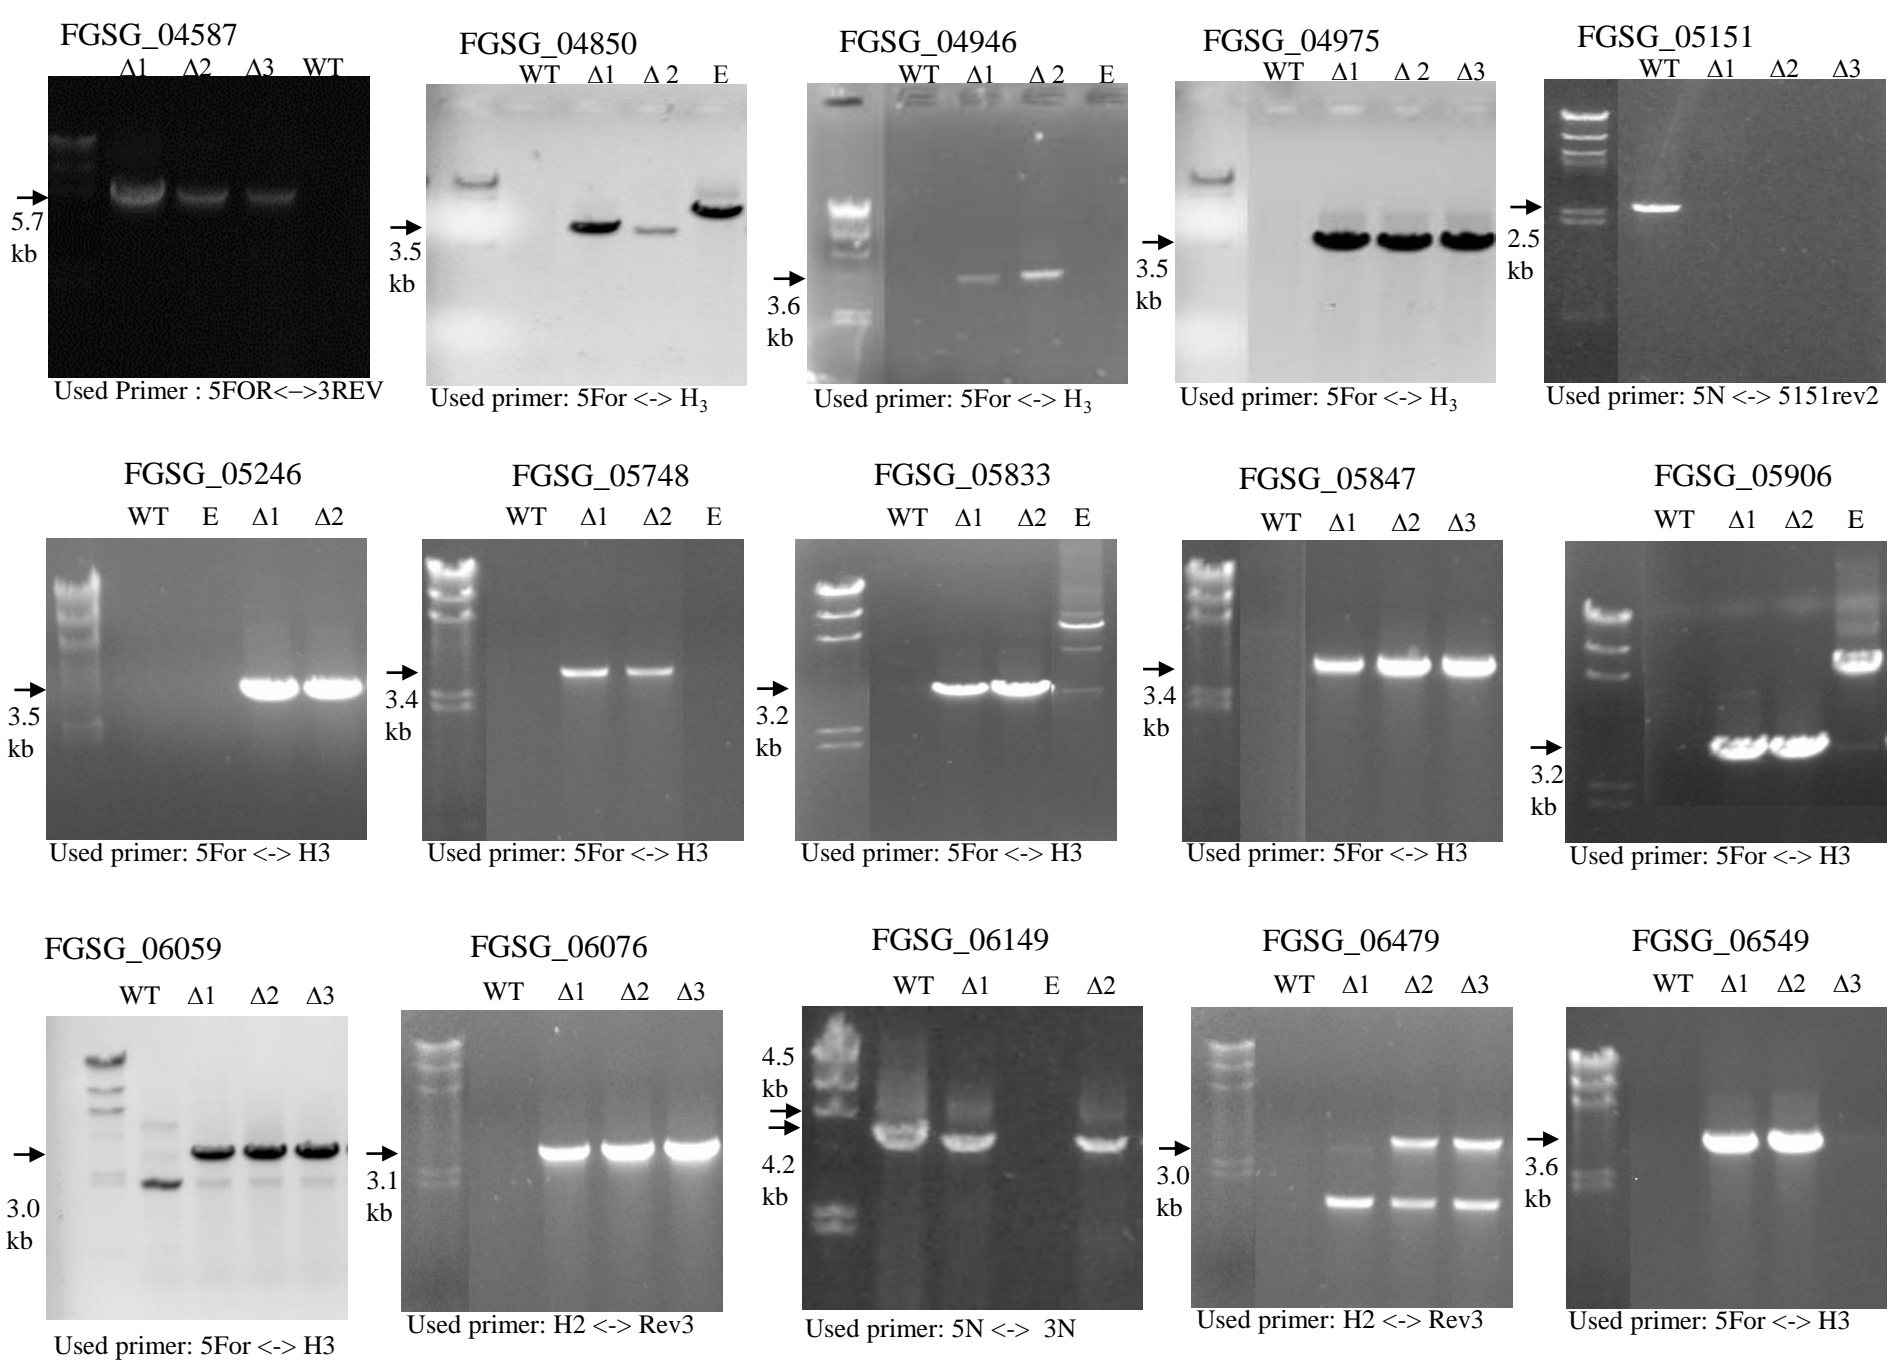

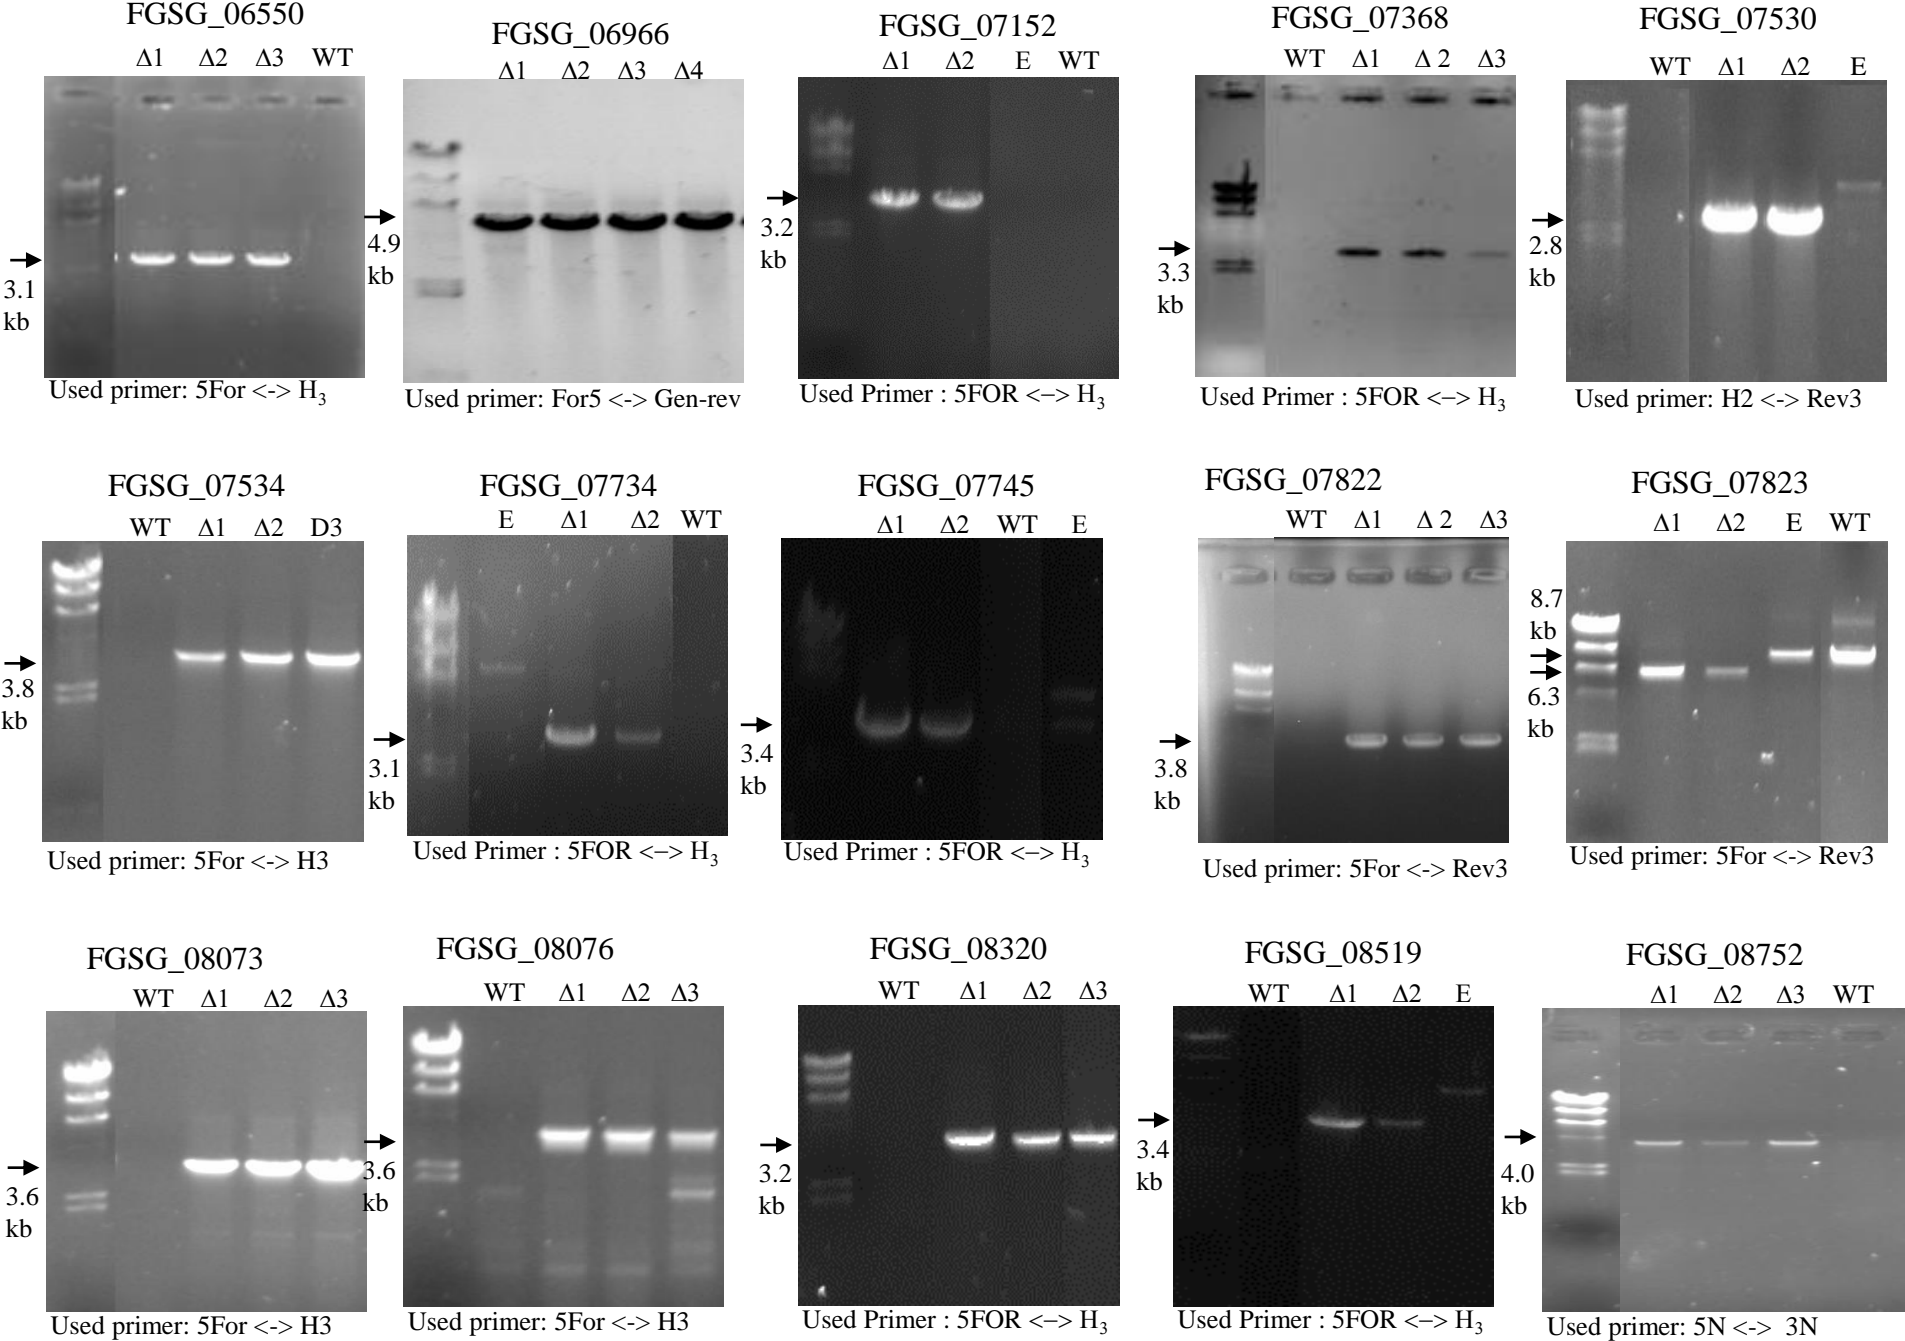

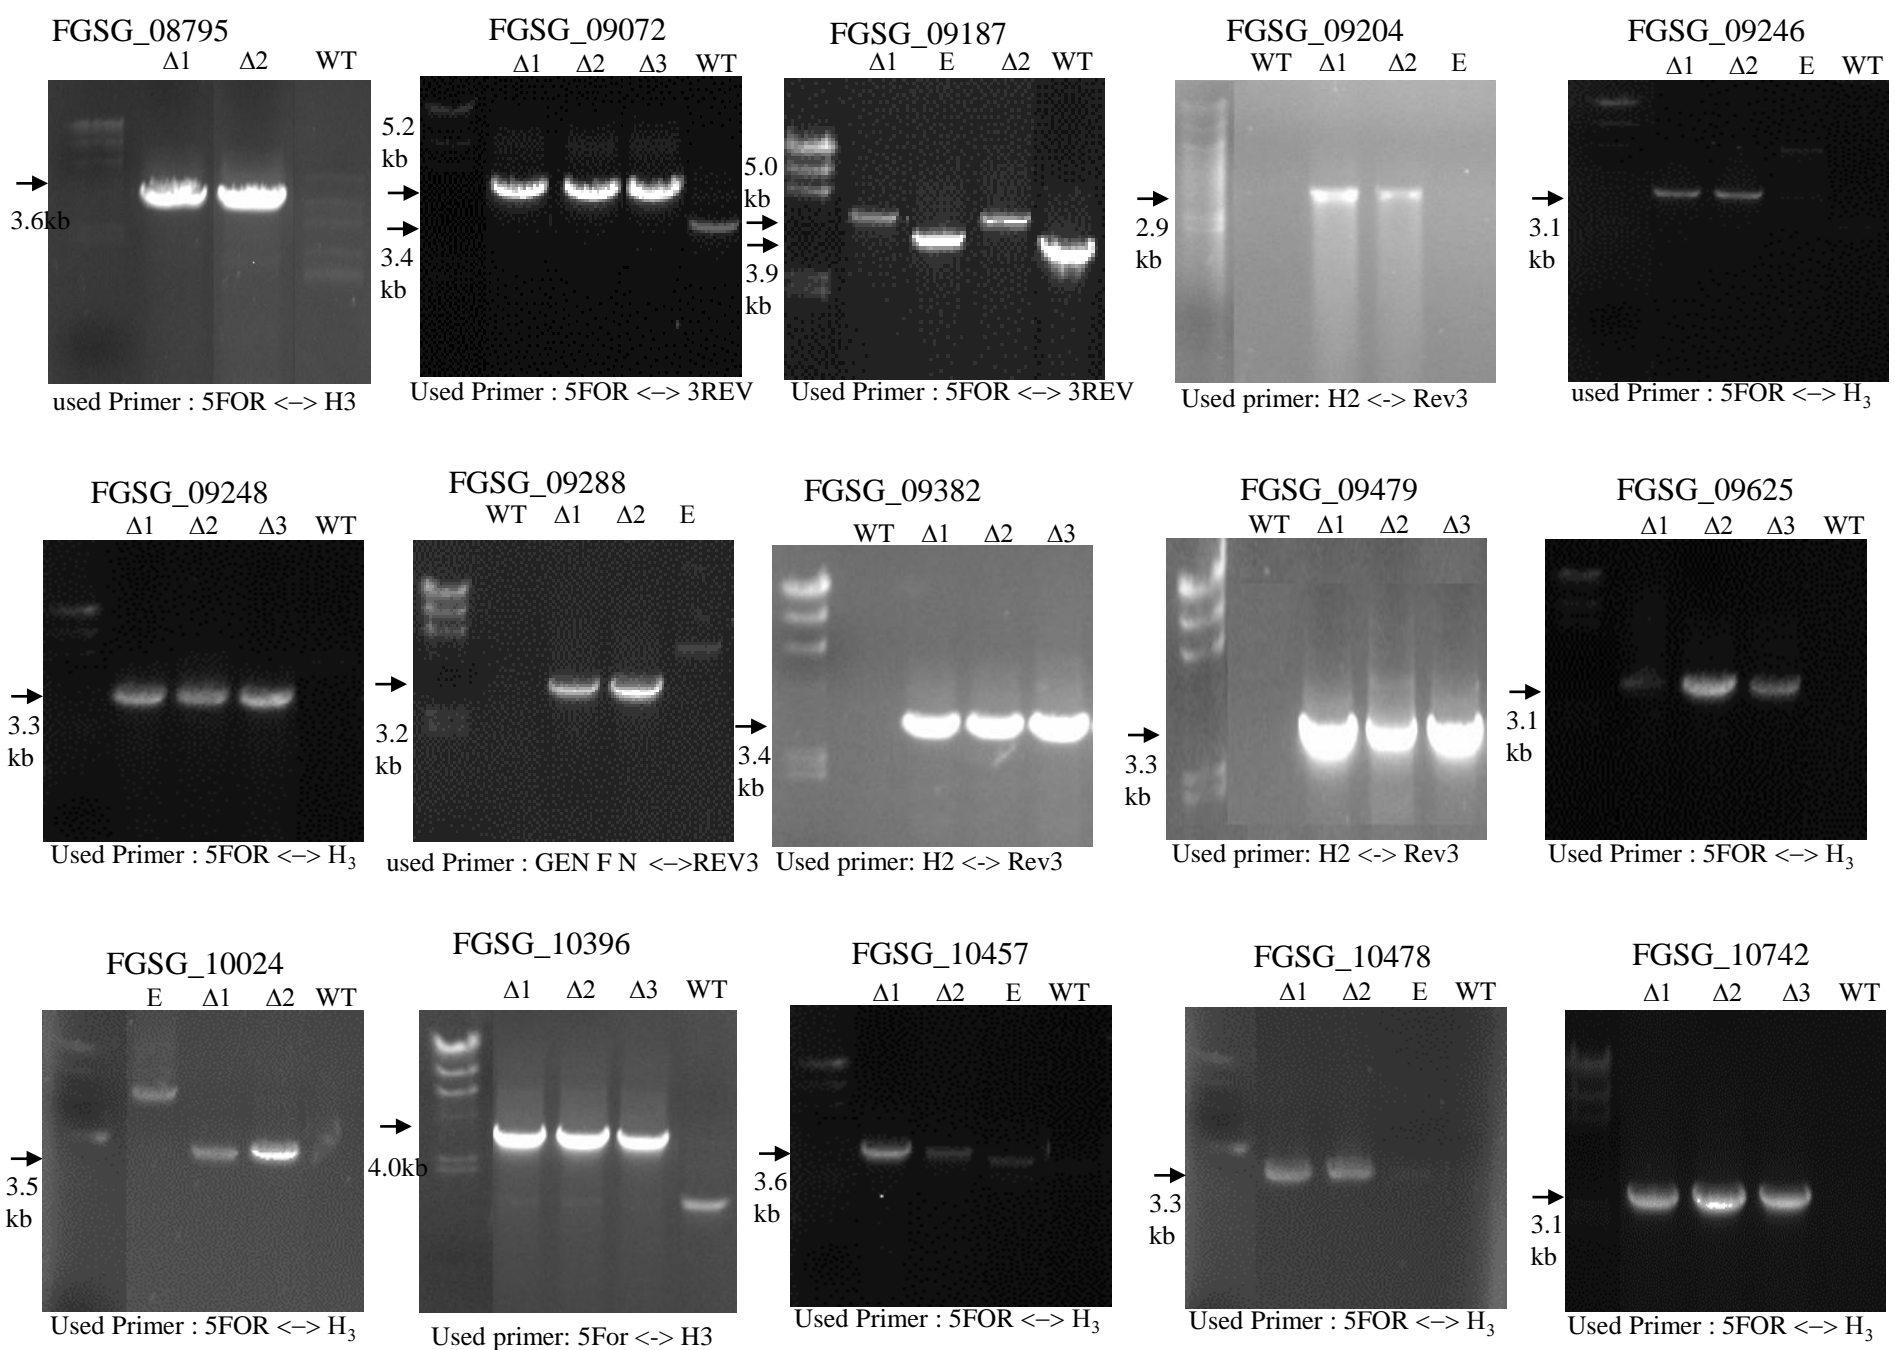

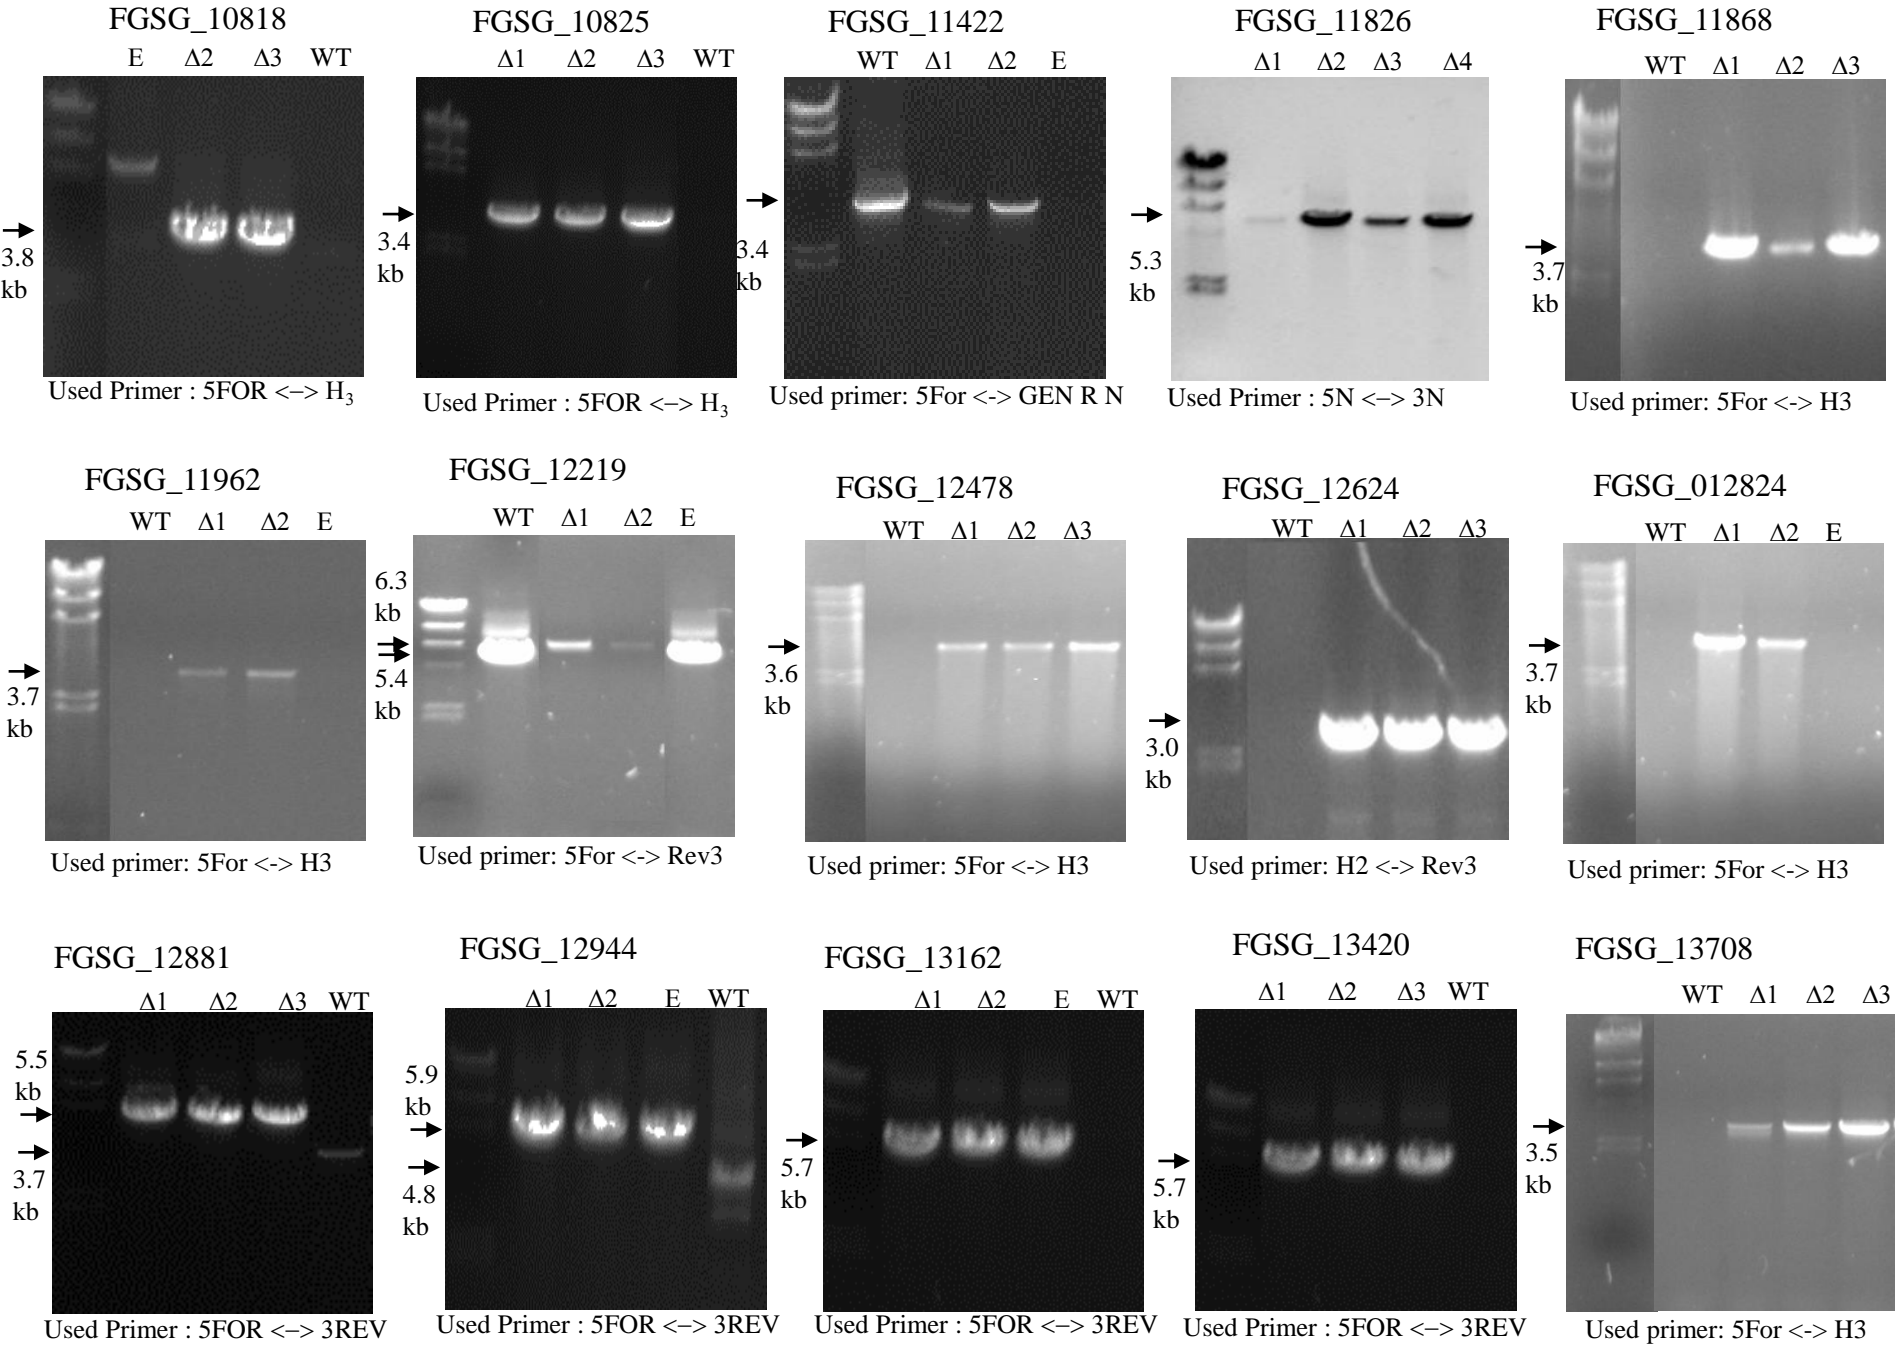

FGSG\_13860

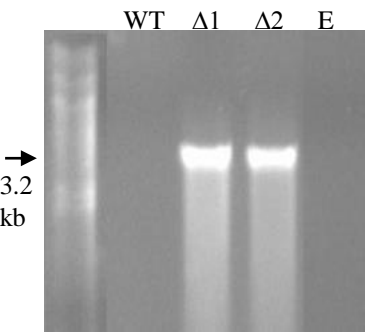

Used primer: 5For <-> H3

FGSG\_14031

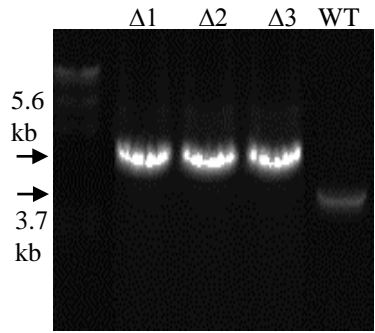

Used Primer : 5FOR <-> 3REV
