# Supplementary material for: A Large-Scale Functional Analysis of Putative Target Genes of Mating-Type Loci Provides Insight into the Regulation of Sexual Development of the Cereal Pathogen Fusarium graminearum
Source: PLoS Genet. 2015 Sep 3;11(9):e1005486. doi: 10.1371/journal.pgen.1005486 (PMC4559316; doi:10.1371/journal.pgen.1005486)
Supplement: S10 Table — (XLSX) [file pgen.1005486.s023.xlsx]

## Sheet: S10 Table
S10 Table. Numbers of the DEGs under investigation for their functions
Expression	# genes deleted			# genes for phenotypic changes			# genes for SD only	# genes for SD + other phenotype	# genes for other phenotype
	sub- total	this study	previously characterized	sub- total	this study	previously characterized
DDD	46	40	12	19	14	11	16	3	0
DND	2	0	2	2	0	2	2	0	0
NND	3	2	2	2	1	1	2	0	0
NDD	1	0	1	1	0	1	1	0	0
DDN	31	29	3	4	3	3	1	2	1
DNN	10	7	3	4	2	2	0	2	2
NDN	6	5	1	0	0	0	0	0	0
UUN (D in OM2)	3	3	0	0	0	0	0	0	0
UNN	6	4	3	2	2	1	0	2	0
NUN	8	8	0	1	1	0	1	0	0
NUU	1	1	0	0	0	0	0	0	0
UUD	1	1	0	0	0	0	0	0	0
UUU	1	1	0	0	0	0	0	0	0
D in OM2	7	5	4	4	2	4	1	3	0
U in OM2	1	0	1	1	0	1	1	0	0
NNN
total*	127	106	32	40	25	26	25	12	3
*reflected by overlapped genes that were investigated both in this and previous studies. SD: sexual development
